# Supplementary material
Source: MDPI journal article supplement (https://www.mdpi.com/2072-4292/7/3/2871)
Supplement: s2 [file s2]

Supplementary

**Table S2:** Spectral variables derived from AISA DUAL image spectra and corresponding band number after removal of atmospheric water absorption & zero variance channels

| **Spectral Variables** | **Reference** | **Band Number** |
| --- | --- | --- |
| **Continuous Spectrum Transformation** | | |
| Reflectance |  | 1–282 |
| Continuum Removal | [1] | 283–562 |
| Savitzky-Golay Derivation | [2] | 563–844 |
| **Vegetation Indices** | | |
| *Plant Water State* |  |  |
| Wetness Index | WI [2] | 845 |
| Normalized Differenced Wetness Index | NDWI [4] | 846 |
| Normalized Differenced Wetness Index 2 | NDWI 2 [5] | 847 |
| Moisture Stress Index | MSI [6] | 848 |
| Disease Water Stress Index | DSWI [7] | 849 |
| Leaf Water Content | LWC [8] | 850 |
| *Chlorophyll Absorption* |  |  |
| Leaf Chlorophyll Index | LCI [9] | 851 |
| Transformed Chlorophyll Absorption Ratio | TCARI [10] | 852 |
| Optimized Soil Adjusted Vegetation Index | TCARI/OSAVI [11] | 853 |
| Maccioni | Maccioni [12] | 854 |
| Triangular Chlorophyll Index | TCI [13] | 855 |
| MERIS Terrestrial Chlorophyll Index | MTCI [14] | 856 |
| *Pigment Absorption* |  |  |
| Structure Intensive Pigment Index | SIPI [15] | 857 |
| Photochemical Reflectance Index | PRI [15] | 858 |
| Chlorophyll Reflection Index | CRI [16] | 859 |
| Anthocyanin Reflectance Index | ARI [16] | 860 |
| Plant Senescence Reflectance Index | PSRI [17] | 861 |
| Relative Greenness Index | RGI [18] | 862 |
| *Cellulose Absorption* |  |  |
| Cellulose Absorption Index | CAI [19] | 863 |
| *Lignin Absorption* |  |  |
| Normalized Difference Lignin Index | NDLI [20] | 864 |
| *Nitrogen Absorption* |  |  |
| Normalized Difference Nitrogen Index | NDNI [20] | 865 |
| Normalized Difference 1510 Ratio | NRI1510 [21] | 866 |
| Red Edge Inflection Point | REIP [21] | 867 |
| **Band Depth Normalized Absorption Features** | | |
| Reflectance 408–Reflectance 518 | [22] | 868–883 |
| Reflectance 550–Reflectance 750 | 884–925 |
| Reflectance 920–Reflectance 1000 | 926–939 |
| Reflectance 1116–Reflectance 1284 | 940–965 |
| Reflectance 1634–Reflectance 1786 | [23] | 966–981 |
| Reflectance 2006–Reflectance 2196 | 982–1011 |
| Reflectance 2222–Reflectance 2378 | 1012–1035 |

References

1. Clark, R.N.; King, T.V.V.; Gorelick, N.S. Automatic continuum analysis of reflectance spectra.
   In Proceedings of The Third AIS workshop, Pasadena, CA, USA, 2–4 June 1987; pp. 138–142.
2. Savitzky, A.; Golay, M.J. Smoothing and differentiation of data by simplified least squares procedures. *Anal. Chem*. **1964**, *36*, 1627–1639.
3. Penuelas, J.; Pinol, J.; Ogaya, R.; Filella, I. Estimation of plant water concentration by the reflectance water index WI (R900/R970). *Int. J. Remote Sens*. **1997**, *18*, 2869–2875.
4. Gao, B.C. NDWI—A normalized difference water index for remote sensing of vegetation liquid water from space. *Remote Sens. Environ*. **1996**, *58*, 257–266.
5. Serrano, L.; Ustin, S.L.; Roberts, D.A.; Gamon, J.A.; Penuelas, J. Deriving water content of chaparral vegetation from AVIRIS data. *Remote Sens. Environ*. **2000**, *74*, 570–581.
6. Hunt, E.R., Jr.; Rock, B.N. Detection of changes in leaf water content using near-and
   middle-infrared reflectances. *Remote Sens. Environ*. **1989**, *30*, 43–54.
7. Galvão, L.S.; Formaggio, A.R.; Tisot, D.A. Discrimination of sugarcane varieties in Southeastern Brazil with EO-1 Hyperion data. *Remote Sens. Environ.* **2005**, *94*, 523–534.
8. Hunt, R., Jr.; Rock, B.N.; Nobel, P.S. Measurement of leaf relative water content by infrared reflectance. *Remote Sens. Environ*. **1987**, *22*, 429–435.
9. Datt, B. A New Reflectance Index for Remote Sensing of Chlorophyll Content in Higher Plants: Tests using<i> Eucalyptus</i> Leaves. *J. Plant Physiol*. **1999**, *154*, 30–36.
10. Haboudane, D.; Miller, J.R.; Tremblay, N.; Zarco-Tejada, P.J.; Dextraze, L. Integrated
    narrow-band vegetation indices for prediction of crop chlorophyll content for application to precision agriculture. *Remote Sens. Environ*. **2002**, *81*, 416–426.
11. Rondeaux, G.; Steven, M.; Baret, F. Optimization of soil-adjusted vegetation indices. *Remote Sens. Environ*. **1996**, *55*, 95–107.
12. Maccioni, A.; Agati, G.; Mazzinghi, P. New vegetation indices for remote measurement of chlorophylls based on leaf directional reflectance spectra. *J. Photochem. Photobiol. B: Biology* **2001**, *61*, 52–61.
13. Hunt, E.R.; Daughtry, C.S.T.; Eitel, J.U.; Long, D.S. Remote sensing leaf chlorophyll content using a visible band index. *Agron. J*. **2011**, *103*, 1090–1099.
14. Dash, J.; Curran, P.J. The MERIS terrestrial chlorophyll index. *Inter. J. Remote Sens*. **2004**, *25*, 5403–5413
15. Penuelas, J.; Baret, F.; Filella, I. Semi-empirical indices to assess carotenoids/chlorophyll a ratio from leaf spectral reflectance. *Photosynthetica* **1995**, *31*, 221–230.
16. Gitelson, A.A.; Merzlyak, M.N.; Chivkunova, O.B. Optical Properties and Nondestructive Estimation of Anthocyanin Content in Plant Leaves. *Photochem. Photobiol*. **2001**, *74*, 38–45.
17. Merzlyak, M.N.; Gitelson, A.A.; Chivkunova, O.B.; Rakitin, V.Y. Non‐destructive optical detection of pigment changes during leaf senescence and fruit ripening. *Physiologia Plantarum* **1999**, *106*, 135–141.
18. Ceccato, P.; Flasse, S.; Tarantola, S.; Jacquemoud, S.; Grégoire, J.M. Detecting vegetation leaf water content using reflectance in the optical domain. *Remote Sens. Environ*. **2001**, *77*, 22–33.
19. Daughtry, C.S.T.; Nagler, P.L.; Kim, M.S.; McMurtrey, J.E., III; Chappelle, E.W. Spectral reflectance of soils and crop residues. In *Near Infrared Spectroscopy: The Future Waves*;NIR Publications: Chichester, UK, 1996; pp. 505–510.
20. Serrano, L.; Penuelas, J.; Ustin, S.L. Remote sensing of nitrogen and lignin in Mediterranean vegetation from AVIRIS data: Decomposing biochemical from structural signals. *Remote Sens. Environt*. **2002**, *81*, 355–364.
21. Herrmann, I.; Karnieli, A.; Bonfil, D.J.; Cohen, Y.; Alchanatis, V. SWIR-based spectral indices for assessing nitrogen content in potato fields. *Inter. J. Remote Sens*. **2010**, *31*, 5127–5143.
22. Vogelmann, J.E.; Rock, B.N.; Moss, D.M. Red edge spectral measurements from sugar maple leaves. *Remote Sens. Environ*. **1993**, *14*, 1563–1575.
23. Mutanga, O.; Skidmore, A.K. Continuum-removed absorption features estimate tropical savanna grass quality *in situ*. In Proceedings of the 3rd EARSEL Workshop on Imaging Spectroscopy, Herrsching, Germany, 13–16 May 2003; pp. 542–558.

© 2015 by the authors; licensee MDPI, Basel, Switzerland. This article is an open access article distributed under the terms and conditions of the Creative Commons Attribution license (http://creativecommons.org/licenses/by/4.0/).
